# Supplementary material for: Understanding associative polymer self-assembly with shrinking gate fluorescence correlation spectroscopy
Source: Royal Society of Chemistry journal article supplement (doi:10.1039/d4nr00737a), 2024-01-01
Supplement: d4nr00737a2.pdf [file d4nr00737a2.pdf]

## Supp Info FCS

January 19, 2024

# 1 Supporting Information: Understanding Associative Polymer Self-Assembly with Shrinking Gate Fluorescence Correlation Spectroscopy

## 1.1 Timothy J. Murdoch, Baptiste Quienne, Julien Pinaud, Sylvain Caillol and Ignacio Martín-Fabiani

This Jupyter notebook outlines the processing of shrinking gate fluorescence correlation spectroscopy (sgFCS) data collected via time-correlated single photon counting on a PicoQuant MT200 confocal microscope. It describes the data importing, sgFCS processing to generate a family of autocorrelation curves, and subsequent curve fitting combined with Markov chain Monte Carlo (MCMC) sampling to determine uncertainties.

## 1.2 Imports

### 1.2.1 External Packages

```
[15]: import pylab as plt
import pandas as pd
%load_ext autoreload
%autoreload 2
from matplotlib import ticker
%matplotlib inline
import corner
import pickle
```

The autoreload extension is already loaded. To reload it, use:

```
%reload_ext autoreload
```

### 1.2.2 Internal Scripts

Internal scripts for processing also utilise code modified from the following repositories

[https://github.com/SumeetRohilla/readPTU\\_FLIM](https://github.com/SumeetRohilla/readPTU_FLIM)

[https://github.com/dwaithe/FCS\\_point\\_correlator](https://github.com/dwaithe/FCS_point_correlator)

```
[25]: from Scripts.fcs import *
from Scripts.fcs_fitting import *
```

```
#Workaround for compatability of some pickled objects
import sys
sys.path.append(r'Scripts/')
```

### 1.3 Load and Store Decays

Batch sgFCS processing and fitting are both run from a dataframe imported from an excel file containing two columns. - paths: a list of relative or absolute paths to the raw dat (\*.ptu) - pickle\_name: a list of string to generate names of storing results using Python's pickle library

The load\_decays function calculates intensity vs macrotime (s), and total counts vs microtime (ns) for each decay in the dataframe

```
[3]: #Load a list of files
file = 'filenames_Conc_full.xlsx'
df = pd.read_excel(file)
df
```

```
[3]:
                                paths \
0  ../../2023/230607_clean_ibidi_fcs.sptw/HC12_0_...
1  ../../2023/230608_clean_ibidi_ctd.sptw/HC12_0_...
2  ../../2023/230607_clean_ibidi_fcs.sptw/HC12_0_...
3  ../../2023/230607_clean_ibidi_fcs.sptw/HC12_0_...
4  ../../2023/230607_clean_ibidi_fcs.sptw/HC12_0_...
5  ../../2023/230607_clean_ibidi_fcs.sptw/HC12_0_...
6  ../../2023/230607_clean_ibidi_fcs.sptw/HC12_1w...
7  ../../2023/230420_ibidi_FCS.sptw/HC12_2_1.ptu
8  ../../2023/230420_ibidi_FCS.sptw/HC12_5_1.ptu

                                pickle_name
0  0_01wtHC12_12nMsCy3_230607
1   0_1wtHC12_12nMsCy3_230608
2  0_16wtHC12_12nMsCy3_230607
3  0_25wtHC12_12nMsCy3_230607
4   0_4wtHC12_12nMsCy3_230607
5  0_63wtHC12_12nMsCy3_230607
6   1wtHC12_12nMsCy3_230607
7   2wtHC12_12nMsCy3_230420
8   5wtHC12_12nMsCy3_230420
```

```
[4]: #import data and create arrays containing the intensity (cps), macro_time (s),
↳lifetime decays (cts), and decay microtime (ns)
int_cps, int_times, decays, decay_times = load_decays(df)

#store imported decays as a binary pickle to make importing faster in future
with open('decays_supp.bin', 'wb') as f:
    pickle.dump((int_cps, int_times, decays, decay_times),f)
```

```
../../2023/230607_clean_ibidi_fcs.sptw/HC12_0_01wt_sCy3_ibidi_1.ptu
```

TCSPC Hardware: MultiHarpNT3  
Raw Data has been Read!

.././2023/230608\_clean\_ibidi\_ctd.sptw/HC12\_0\_1\_wt\_ibidi\_2.ptu  
TCSPC Hardware: MultiHarpNT3  
Raw Data has been Read!

.././2023/230607\_clean\_ibidi\_fcs.sptw/HC12\_0\_16wt\_sCy3\_ibidi\_1.ptu  
TCSPC Hardware: MultiHarpNT3  
Raw Data has been Read!

.././2023/230607\_clean\_ibidi\_fcs.sptw/HC12\_0\_25wt\_sCy3\_ibidi\_1.ptu  
TCSPC Hardware: MultiHarpNT3  
Raw Data has been Read!

.././2023/230607\_clean\_ibidi\_fcs.sptw/HC12\_0\_4wt\_sCy3\_ibidi\_1.ptu  
TCSPC Hardware: MultiHarpNT3  
Raw Data has been Read!

.././2023/230607\_clean\_ibidi\_fcs.sptw/HC12\_0\_63wt\_sCy3\_ibidi\_1.ptu  
TCSPC Hardware: MultiHarpNT3  
Raw Data has been Read!

.././2023/230607\_clean\_ibidi\_fcs.sptw/HC12\_1wt\_sCy3\_ibidi\_1.ptu  
TCSPC Hardware: MultiHarpNT3  
Raw Data has been Read!

.././2023/230420\_ibidi\_FCS.sptw/HC12\_2\_1.ptu  
TCSPC Hardware: MultiHarpNT3  
Raw Data has been Read!

.././2023/230420\_ibidi\_FCS.sptw/HC12\_5\_1.ptu  
TCSPC Hardware: MultiHarpNT3  
Raw Data has been Read!

```
[5]: #unpack pickled decays  
with open('decays_supp.bin', 'rb') as f:  
    int_cps, int_times, decays, decay_times = pickle.load(f)
```

## 1.4 Decays Visualisation

To get a quickly check the data quality and look at overall trends we can plot the data in 3 ways - Normalised fluorescence decay vs microtime to look at level of background in each sample - Normalised background corrected fluorescence decay vs microtime to look at trends in overall lifetime - Intensity vs time to check for large spikes characteristic of aggregates or changes in intensity over time that suggests effects such as bleaching or concentration changes. There is code to correct for these in the sgFCS analysis, but it is better to repeat the experiment

```

[6]: n = decays.shape[1]
fig, ax = plt.subplots(3,1, figsize=((6,8)))
fig.subplots_adjust(hspace=.3)

ax[0].set_prop_cycle('color',[plt.cm.viridis(i) for i in np.linspace(0, 1, n)])
ax[0].semilogy(decay_times[:-5,:], decays[:-5,:] / np.nanmax(decays[:,:]
    ↪),axis=0))
ax[0].set_xlabel('Time (ns)')
ax[0].set_ylabel('Norm Counts')
ax[0].set_ylim(8e-4)
ax[0].set_xlim(1,)
ax[1].set_prop_cycle('color',[plt.cm.viridis(i) for i in np.linspace(0, 1, n)])
ax[1].semilogy(decay_times[:-5,:], (decays[:-5,:] - decays[10,:]) / np.
    ↪nanmax(decays[:,:] - decays[10,:],axis=0))
ax[1].set_xlabel('Time (ns)')
ax[1].set_ylabel('Norm Counts Bck. Corr.')
ax[1].set_ylim()
ax[1].set_xlim(1,)

ax[2].set_prop_cycle('color',[plt.cm.viridis(i) for i in np.linspace(0, 1, n)])
ax[2].semilogy(int_times, int_cps)
ax[2].set_xlabel('Time (s)')
ax[2].set_ylabel('cps')
ax[0].legend(df.pickle_name,fontsize=8)

```

```

[6]: <matplotlib.legend.Legend at 0x16f4e1f1d20>

```

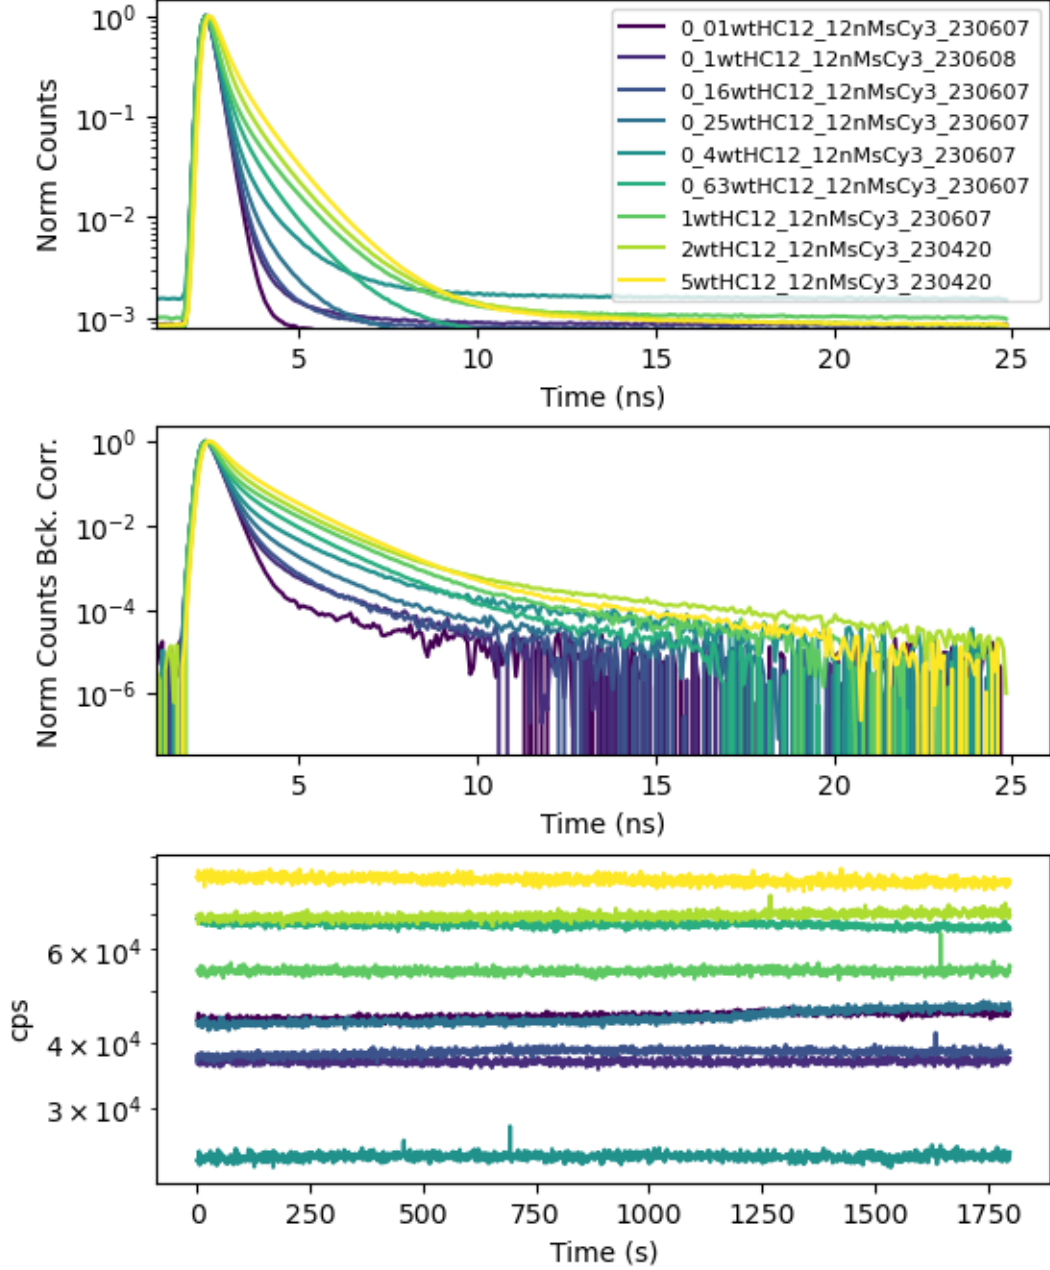

### 1.5 Shrinking Gate Fluorescence Correlation Spectroscopy Processing

In shrinking gate fluorescence correlation spectroscopy (sgFCS) we calculate the autocorrelation function  $G(\tau, t_g)$  for increasingly smaller subset of photons set by gate time,  $t_g$ :

$$G(\tau, t_g) = \frac{\langle I(t, t_g)I(t + \tau, t_g) \rangle}{\langle I(t, t_g) \rangle^2}$$

where  $I(t)$  is the intensity at time  $t$  and  $\tau$  is the lag time. Here,  $t_g$  refers to the photon arrival time

relative to the pulse, i.e. the micro-time

We take advantage of a Python/Cython implementation of the algorithm from Wahl et al (Optics Express,2003,11,3583) for calculating:  $G(\tau)$  from TCSPC data [https://github.com/dwaithe/FCS\\_point\\_correlator](https://github.com/dwaithe/FCS_point_correlator) / doi: 10.1093/bioinformatics/btv687

```
from focuspoint.correlation_methods.correlation_methods import tttr2xfcs
```

Our code performs sgFCS by filtering the microtime array for increasingly large values of  $t_g$  and supplying the filtered array to tttr2xfcs

The rest of the code largely just automates process to various degrees

### 1.5.1 ShrinkFitter Class and Data Visualisation

Data is processed using the ShrinkFitter class. This class contains the processed sgFCS data, the necessary functions for processing, and the corresponding TCSPC data for comparison if wanted. When processing data we specify a range of start gates, instead of a range  $t_g$  values, as well as the number of steps to perform. By default we process from  $t_g$  up to the 5th last gate to counting artefacts in the last TCSPC bin, but other maximum values can be specified.

To choose an appropriate range of start gates we choose the condition with the longest average lifetime and plot chosen start gates

```
[9]: file = 'filenames_Conc_full.xlsx'
df = pd.read_excel(file)
num = 6
path = df.paths[num]
decay = decays[:,num]
decaytime = decay_times[:,num]
micro_res = (decay_times[150,num] - decay_times[100,num])/50
start_gate_low = 25
start_gate_high = 100
n_steps = 10
fitter = ShrinkFitter(path=path,xstart=start_gate_low,xend=start_gate_high,nsteps=n_steps,
micro_res=micro_res,decay=decay,decay_time=decaytime, bckg=False)
```

```
[10]: fig, ax = plt.subplots()
n = n_steps
ax.set_prop_cycle('color', [plt.cm.plasma(i) for i in np.linspace(0, 1, n)])
decay = fitter.decay
decaytime = fitter.decay_time

micro_res = fitter.micro_res
gates = np.linspace(start_gate_low,start_gate_high,n)

for i in range(n):
```

```

ax.fill_between(decaytime[: -5],decay[: -5], where = decaytime[: -5] >
↳gates[i]*micro_res,alpha=0.8)

ax.semilogy(decaytime[: -1],decay[: -1], 'k')
secax = ax.secondary_xaxis(1, functions=(lambda x: x / micro_res, lambda x: x *
↳micro_res ))
secax.set_xlabel('Bins')

leg = np.around(np.linspace(0,start_gate_high - start_gate_low,n)*micro_res,1)
plt.legend(leg,title='Tgate (ns)',loc='upper right')
plt.title(df.pickle_name[num],y=0.9)

plt.ylim(1e3,)
plt.xlim(0,25)
ax.set_xlabel('Time (ns)',fontsize=14)
ax.set_ylabel('Counts',fontsize=14)
ax.xaxis.set_minor_locator(ticker.AutoMinorLocator())

```

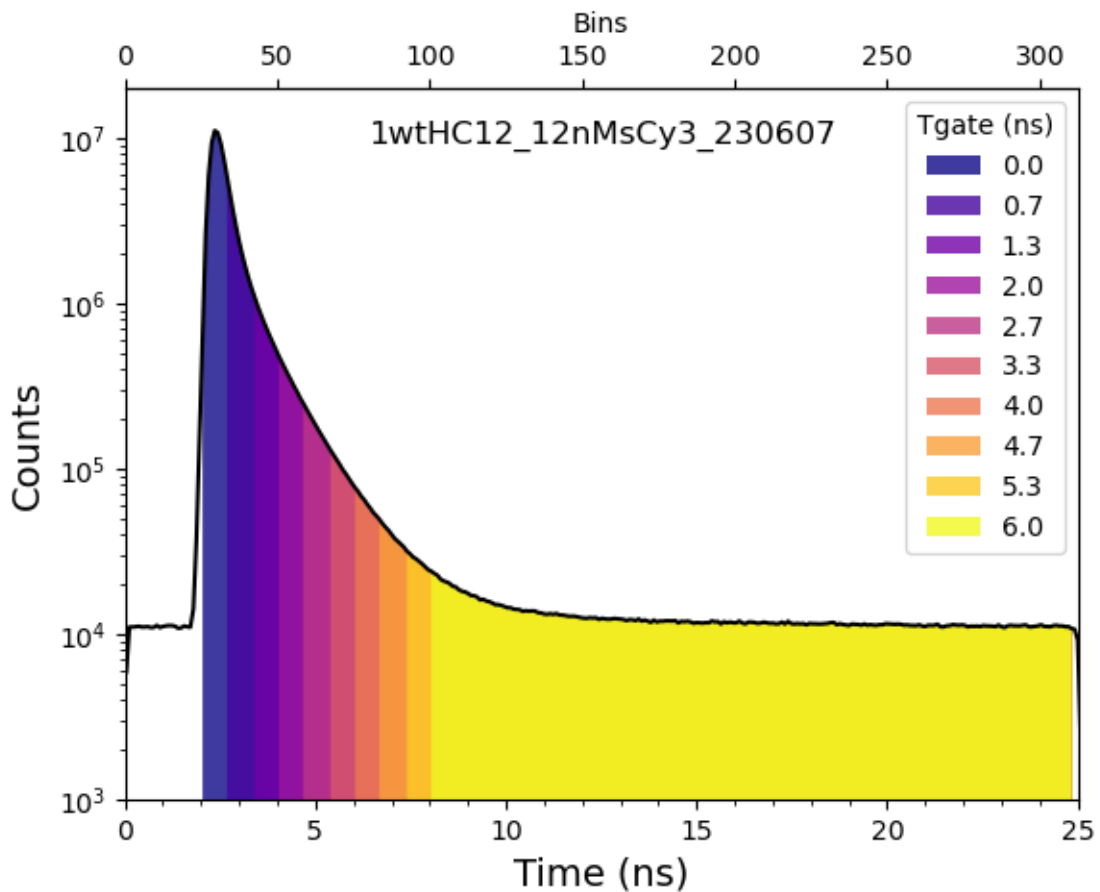

**Single shrinking gate** sgFCS is typically performed with the shrinkChop routine. At each  $t_g$ , the original data is chopped into a number of even macro-time slices and  $G(\tau)$  is calculated for each slice. We choose 10 slices which satisfies  $slicelength > 10^5 \tau_D$  (see <https://iopscience.iop.org/article/10.1088/1367-2630/12/11/113009>) for all conditions except 5 wt% HEUR, where 5 slices were used.

A modified version of the algorithm of Ries, J. et al. Optics Express 2010, 18 (11), 11073 is used to is used to exclude slices where the ratio of the average deviation of  $G(\tau)$  relative to the minimum deviation is larger than a split ratio. The mean and stdev of  $G(\tau)$  for all slices and the accepted slices, as well as the individual  $G(\tau)$ , are stored in the fitter object. A range of split ratios should be tested to see their effect on the fitted diffusion coefficients.

```
[12]: #TCSPC data are not stored in the class object due to their large size
dTimeArr, trueTimeArr, subChanArr, micro_res = loader(fitter.path)
n_slice = 10
split = 10
fitter.nsteps = 3 #reduce number of sgFCS steps for the example
fitter.
↳shrinkChop(subChan=subChanArr,tTime=trueTimeArr,dTime=dTimeArr,n_slice=n_slice,comb_filt=No
```

TCSPC Hardware: MultiHarpNT3

Raw Data has been Read!

Choppin

```
y [6.29988660e+03 1.13247962e+04 1.22747791e+04 ... 1.79999950e+11
1.79999966e+11 1.79999990e+11] float64
total photons in gate = 9792134.0
y [1.80000002e+11 1.80000004e+11 1.80000030e+11 ... 3.59999909e+11
3.59999930e+11 3.59999988e+11] float64
total photons in gate = 9797095.0
y [3.60000012e+11 3.60000014e+11 3.60000021e+11 ... 5.39999919e+11
5.39999955e+11 5.39999984e+11] float64
total photons in gate = 9782495.0
y [5.40000035e+11 5.40000090e+11 5.40000108e+11 ... 7.19999960e+11
7.19999961e+11 7.19999975e+11] float64
total photons in gate = 9768871.0
y [7.20000034e+11 7.20000050e+11 7.20000059e+11 ... 8.99999890e+11
8.99999912e+11 8.99999936e+11] float64
total photons in gate = 9775125.0
y [9.00000016e+11 9.00000017e+11 9.00000031e+11 ... 1.07999996e+12
1.07999998e+12 1.07999999e+12] float64
total photons in gate = 9772939.0
y [1.08000000e+12 1.08000002e+12 1.08000008e+12 ... 1.25999996e+12
1.25999998e+12 1.25999999e+12] float64
total photons in gate = 9813835.0
y [1.26000000e+12 1.26000005e+12 1.26000007e+12 ... 1.43999995e+12
1.43999996e+12 1.43999998e+12] float64
total photons in gate = 9796442.0
y [1.44000002e+12 1.44000003e+12 1.44000004e+12 ... 1.61999988e+12
```



```

1.61999992e+12 1.61999997e+12] float64
total photons in gate = 9779864.0
y [1.62000003e+12 1.62000005e+12 1.62000007e+12 ... 1.79998624e+12
1.79998626e+12 1.79998626e+12] float64
total photons in gate = 9799437.0
Less than half accepted. Normalising by next closest curve
Less than half accepted. Normalising by next closest curve
Less than half accepted. Normalising by next closest curve
Choppin
y [1.23922769e+05 2.69820143e+05 4.28967279e+05 ... 1.79999249e+11
1.79999366e+11 1.79999787e+11] float64
total photons in gate = 535839.0
y [1.80000039e+11 1.80000224e+11 1.80000674e+11 ... 3.59998912e+11
3.59998941e+11 3.59999676e+11] float64
total photons in gate = 531218.0
y [3.60000133e+11 3.60000406e+11 3.60000472e+11 ... 5.39999047e+11
5.39999162e+11 5.39999746e+11] float64
total photons in gate = 534420.0
y [5.40000386e+11 5.40000738e+11 5.40000754e+11 ... 7.19998552e+11
7.19998775e+11 7.19999532e+11] float64
total photons in gate = 531897.0
y [7.20000721e+11 7.20000939e+11 7.20001161e+11 ... 8.99998134e+11
8.99998235e+11 8.99999595e+11] float64
total photons in gate = 528772.0
y [9.00000205e+11 9.00000206e+11 9.00001038e+11 ... 1.07999976e+12
1.07999977e+12 1.07999995e+12] float64
total photons in gate = 517255.0
y [1.08000059e+12 1.08000080e+12 1.08000110e+12 ... 1.25999884e+12
1.25999974e+12 1.25999986e+12] float64
total photons in gate = 537577.0
y [1.26000021e+12 1.26000063e+12 1.26000083e+12 ... 1.43999990e+12
1.43999995e+12 1.43999998e+12] float64
total photons in gate = 541086.0
y [1.44000004e+12 1.44000025e+12 1.44000056e+12 ... 1.61999923e+12
1.61999952e+12 1.61999959e+12] float64
total photons in gate = 537369.0
y [1.62000022e+12 1.62000032e+12 1.62000044e+12 ... 1.79998483e+12
1.79998527e+12 1.79998566e+12] float64
total photons in gate = 547246.0
Less than half accepted. Normalising by next closest curve
Less than half accepted. Normalising by next closest curve
Choppin
y [4.28967279e+05 4.12960067e+06 4.31739729e+06 ... 1.79996842e+11
1.79999084e+11 1.79999787e+11] float64
total photons in gate = 261976.0
y [1.80000039e+11 1.80001645e+11 1.80002633e+11 ... 3.59998912e+11
3.59998941e+11 3.59999676e+11] float64
total photons in gate = 259770.0

```

```

y [3.60000406e+11 3.60002071e+11 3.60002139e+11 ... 5.39997577e+11
 5.39997907e+11 5.39999047e+11] float64
total photons in gate = 261809.0
y [5.40000738e+11 5.40000754e+11 5.40001461e+11 ... 7.19994688e+11
 7.19995469e+11 7.19996927e+11] float64
total photons in gate = 260085.0
y [7.20000939e+11 7.20001161e+11 7.20001269e+11 ... 8.99998134e+11
 8.99998235e+11 8.99999595e+11] float64
total photons in gate = 258358.0
y [9.00000206e+11 9.00001038e+11 9.00002239e+11 ... 1.07999961e+12
 1.07999977e+12 1.07999995e+12] float64
total photons in gate = 248242.0
y [1.08000059e+12 1.08000080e+12 1.08000110e+12 ... 1.25999884e+12
 1.25999974e+12 1.25999986e+12] float64
total photons in gate = 265946.0
y [1.26000021e+12 1.26000097e+12 1.26000121e+12 ... 1.43999990e+12
 1.43999990e+12 1.43999998e+12] float64
total photons in gate = 269878.0
y [1.44000004e+12 1.44000065e+12 1.44000075e+12 ... 1.61999869e+12
 1.61999916e+12 1.61999923e+12] float64
total photons in gate = 268026.0
y [1.62000022e+12 1.62000105e+12 1.62000198e+12 ... 1.79998361e+12
 1.79998400e+12 1.79998527e+12] float64
total photons in gate = 274676.0
Less than half accepted. Normalising by next closest curve
Less than half accepted. Normalising by next closest curve

```

**Batch sgFCS Example** All PTU files in the dataframe can be batch processed using the `batch_class_chop` function. Each file is stored as its own fitter object for later analysis. Options such as background correction, smoothing, and selecting a subrange of files are described in the function docstring.

```

[ ]: xstart = 25
      xend = 100
      n_steps = 10
      n_slice = 20
      split = 10
      folder = 'Processed_data'
      batch_class_chop(df, xstart=xstart, xend=xend, nsteps=n_steps, n_slice=n_slice,
        ↪ folder=folder, split=split)

```

**Comparison of  $G(\tau)$  from Complete and Accepted Subset** In our sgFCS experiments, the algorithm for excluding curves that differ significantly from the average doesn't affect the average autocorrelation value significantly. However as seen below, there is a significant reduction in the standard deviation used to weight subsequent fits.

[23]:

```


```

Processed\_Data/1wtHC12\_12nMsCy3\_23060710.bin

```
[24]: file = 6
folder = 'Processed_Data/'
split = 10
split = split if split != None else ''
with open(f'{folder}{df.pickle_name[file]}{split}.bin','rb') as f:
    data = pickle.load(f)

ind = np.where(data.autoTimes > 0.01)[0][0]
n = data.autoTimes.shape[1]

fig, ax = plt.subplots(1,3,figsize=(15,4))

fig.suptitle(df.pickle_name[file])
ax[0].semilogx()
ax[1].semilogx()

for axis in ax:
    axis.set_prop_cycle('color',[plt.cm.viridis(i) for i in np.linspace(0, 1, n)
    ↪n)])
    axis.set_ylim(0,1)
    axis.set_xlim(1e-4,1e2)
    axis.set_xlabel(r'$\tau$ (ms)')

colors = [[plt.cm.viridis(i),plt.cm.viridis(i)] for i in np.linspace(0, 1, n)]
colors = [color for sublist in colors for color in sublist]
ax[2].set_prop_cycle('color',colors)

for ind in range(n):
    ax[0].errorbar(data.autoTimes[:,ind],data.autoCorrNorm[:,ind],yerr=data.
    ↪autoCorrStd[:,ind],
                    linewidth=0.5,linestyle='None',marker='.')
    ax[1].errorbar(data.autoTimes[:,ind],data.autoCorrNormSub[:,ind],yerr=data.
    ↪autoCorrStdSub[:,ind],
                    linewidth=0.5,linestyle='None',marker='.')
    ax[2].semilogx(data.autoTimes[:,ind],data.autoCorrNorm[:,ind],
                    linestyle='None',marker='.')
    ax[2].semilogx(data.autoTimes[:,ind],data.autoCorrNormSub[:,ind],
                    linestyle='None',marker='.',fillstyle='none')

ax[0].set_ylabel(r'$G(\tau)$')

ax[1].set_xlabel(r'$\tau$ (ms)')

leg = np.around(np.linspace(0,data.xend - data.xstart,n)*data.micro_res,1)
```

```
ax[0].legend(leg,title=r'$t_{\mathrm{g}}$ (ns)')

ax[0].set_title('All Slices')
ax[1].set_title('Accepted Slices')
ax[2].set_title('All (closed), Accepted (open)')
```

[24]: Text(0.5, 1.0, 'All (closed), Accepted (open)')

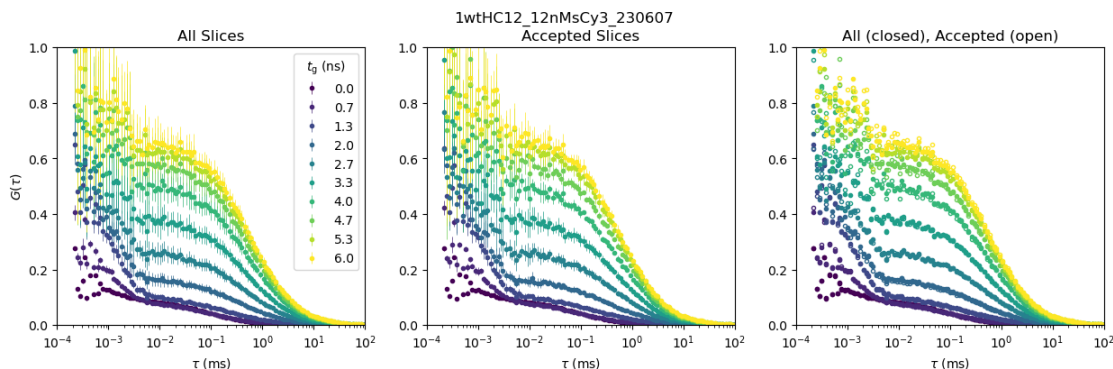

## 1.6 Shrinking Gate FCS Curve Fitting

The autocorrelation function of a species diffusing through a 3D Gaussian confocal volume,  $G_D(\tau)$  can be represented by:

$$G_D(\tau) = \frac{1}{N} \sum_i^n f_i \frac{1}{\left(1 + \frac{\tau}{\tau_i}\right)} \frac{1}{\left(1 + \frac{\tau}{K^2 \tau_i}\right)^{0.5}}$$

where  $N$  is the number of molecules,  $n$  is the number of diffusing species,  $K$  is the calibrated aspect ratio of the confocal volume, and  $f_i$  and  $\tau_i$  are the fraction and characteristic diffusion time of species  $i$ , respectively. NB that from multiple species, this equation is only true if the brightness of each species is identical. If they are not identical only  $N$  and  $f_i$  will be distorted. Extended equations that incorporate non-equal brightness exist, but have not been implemented yet.

We represent the contribution of fast exponential processes (e.g. photoisomerisation of sCy3 dye from light to dark state or triplet processes) by:

$$G_{\text{fast}}(\tau) = \left(1 + \frac{f}{1-f} e^{-\frac{\tau}{\tau_{\text{fast}}}}\right)$$

where  $f$  is the fraction of molecules in the dark state, and  $\tau_{\text{fast}}$  is the characteristic relaxation time.

Assuming the two processes considered are well separated in time, the overall autocorrelation function is:

$$G(\tau) = G_{\text{fast}}(\tau)G_D(\tau) + G_{\infty}$$

where  $G_{\infty}$  is a baseline offset accounting for non-ideal decays.

For more information see a review text such as Wohland, T.; Maiti, S.; Macháň, R. An Introduction to Fluorescence Correlation Spectroscopy; IOP Publishing, 2020. <https://doi.org/10.1088/978-0-7503-2080-1>.

For fitting, the equations above are implemented in a form suitable for use with the lmfit package.

### 1.6.1 Fitting Data from a Single Time Gate

To fit data, we first open the stored ShrinkFitter class object that contains the collection of autocorrelation curves and select a gate index to analyse. There are some systematic errors and artefacts at lower values of  $\tau$  that may arise from the asynchronous nature of the data collection. Therefore the datarange is truncated before processing.

```
[29]: file = 6
      folder = 'Processed_Data' + '/'
      split = 10
      split = split if split != None else ''
      with open(f'{folder}{df.pickle_name[file]}{split}.bin','rb') as f:
          data = pickle.load(f)

      gate = 3

      #Lists of calibration values specific to HEUR data in paper.
      r6g = 7*[0.0624] + 2*[0.05077]
      K = 7*[6.447] + 2*[5.8]
      tau_diff1 = [0.0745,0.0739,0.0707,0.0874,0.0754,0.0939,0.0921,0.1043,0.1658]

      #Outputted autocorrelation gates have systematic so we only analyse a subset of
      ↪the total data array
      x_orig = data.autoTimes[:,gate]
      y_orig = data.autoCorrsNormSub[:,gate]*data.scales[gate] #multiply curves by
      ↪background correction scaling factor
      wgt_orig = data.autoCorrsStdSub[:,gate]*data.scales[gate] #multiply curves by
      ↪background correction scaling factor
      #Remove Negative Correlation Values
      x = x_orig[y_orig>-0.5]
      wgt = wgt_orig[y_orig >-0.5]
      y = y_orig[y_orig>-0.5]
      #Remove
      x_min = 10e-4
      wgt = wgt[x > x_min]
      y = y[x > x_min]
      x = x[x > x_min]
      wgt = 1/wgt
```

To fit the data we create a model from our user-defined autocorrelation functions using the [lmfit package](#). In this paper we have called this model “trip”, but any suitable name can be used.

To use the model we create a parameters object and set the initial parameter values, determine whether they vary during fitting (True/False), their min and max values, and any relationships between parameters if necessary.

```
[27]: n_diff = 1

params = Parameters()
if (n_diff == 1):
    trip = Model(triplet) * Model(diff_3D) +
↳Model(baseline,independent_vars=['tau'])
    #Alternative if you want to sum the models
    # trip = Model(triplet_sum) + Model(diff_3D) +
↳Model(baseline,independent_vars=['tau'])
    params.add_many(('f_fast',0.1,True,0,0.99,None,None),
                    ('tau_fast',3e-4,True,1e-6,5e-3,None,None),
                    ('N',10,True,1e-4,1e3,None,None),
                    ('tau_diff',0.0707,True,1e-2,10,None,None),
                    ('K',K[file],False,1,10,None,None),
                    ('G_inf',0.01,True,-0.1,1e5,None,None),
                    ('N2',1,False,1e-4,1e3,'N',None)) #This parameter is only
↳necessary if
else:
    trip = Model(triplet) * Model(double_diff_3D) +
↳Model(baseline,independent_vars=['tau'])
    params.add_many(('f_fast',0.1,True,0,0.99,None,None),
                    ('tau_fast',1e-3,True,1e-5,5e-3,None,None),
                    ('N',10,True,1e-4,1e3,None,None),
                    ('frac_1',0.1,True,0,0.99,None,None),
                    ('tau_diff1',0.0869,False,1e-2,10,None,None),
                    ('tau_diff2',0.5,True,1e-1,10,None,None),
                    ('K',K[file],False,1,10,None,None),
                    ('G_inf',0.01,True,-0.1,0.1,None,None))
```

In most cases these initial parameters are sufficient for all data in the study, therefore for we can use the paramser function to return the model and a suitable set of parameters.

```
[30]: n_diff = 1

trip,params = paramser(n_diff,tau_diff1[file],K[file])
```

From the model object, we can use the fit function to perform a least\_squares optimisation of the data. As seen below, this is usually sufficient to fit the data with a poor initial guess.

```
[31]: result = trip.fit(y,tau=x, params=params,nan_policy='omit',weights=wgt)
```

```
[32]: print(result.fit_report())
```

```
[[Model]]
  ((Model(triplet) * Model(diff_3D)) + Model(baseline))
[[Fit Statistics]]
  # fitting method      = leastsq
  # function evals      = 43
  # data points         = 107
```

```

# variables          = 5
chi-square          = 64.6238173
reduced chi-square  = 0.63356684
Akaike info crit   = -43.9543008
Bayesian info crit = -30.5901567
R-squared           = -15.8881127
[[Variables]]
f_fast: 0.70264062 +/- 0.02233606 (3.18%) (init = 0.1)
tau_fast: 0.00171480 +/- 1.7357e-04 (10.12%) (init = 0.001)
N: 3.19213157 +/- 0.02911275 (0.91%) (init = 2)
tau_diff: 0.44407280 +/- 0.00848991 (1.91%) (init = 0.07)
K: 6.447 (fixed)
G_inf: 3.1748e-04 +/- 1.2346e-04 (38.89%) (init = 0.01)
N2: 3.19213157 +/- 0.02911275 (0.91%) == 'N'
[[Correlations]] (unreported correlations are < 0.100)
C(f_fast, tau_fast) = -0.8722
C(N, tau_diff) = +0.8147
C(tau_diff, G_inf) = -0.3229
C(tau_fast, N) = +0.2536
C(tau_fast, tau_diff) = +0.2064
C(N, G_inf) = -0.1358

```

```

[33]: fig,ax = plt.subplots()

ax.errorbar(x_orig,y_orig,yerr=wgt_orig,linestyle='None',elinewidth=1,marker='.',
            ↪,fillstyle='none',label='data')
ax.semilogx(x,result.init_fit,'--',label='initial guess')
ax.semilogx(x,result.best_fit,'-',label='best fit')
ax.set_ylabel(r'G($\tau$)')
ax.set_xlabel(r'$\tau$ (ms)')

ax.set_title(df.pickle_name[file])
ax.set_ylim(-0.01,)
ax.set_xlim(1e-4,100)

if (n_diff == 1):
    Diff = diff2(result.params['tau_diff'].value,0.0624)
    R = stokes_R(Diff)
    diff_text = '\n'.join((
        r'Gate num %.0f' % (gate),
        r'$\tau_D=%.4f$ ms' % (result.params['tau_diff'].value),
        r'D=%.2f $\mu$ m /s^2$' % (Diff),
        r'r=%.2f nm' % (R),
        r'N=%.2f molecules' % (result.params['N']),
        r'$\tau_F=%.4f$ ms' % (result.params['tau_fast'].value),
        r'$Frac_{fast}=%.2f$' % (result.params['f_fast']),

```

```

    r'\chi^2_{red}=%.3f$' % (result.redchi))
ax.text(0.65,0.55,diff_text,transform=ax.transAxes,fontsize=12)
else:
Diff = diff2(result.params['tau_diff2'].value,0.0624)
R = stokes_R(Diff)
diff_text = '\n'.join((
    r'Gate num %.0f' % (gate),
    r'\tau_D=%.4f$ ms' % (result.params['tau_diff2'].value),
    r'D=%.2f $ \mu m /s^2$' % (Diff),
    r'r=%.2f nm' % (R),
    r'N=%.2f molecules' % (result.params['N']),
    r'\tau_F=%.4f$ ms' % (result.params['tau_fast'].value),
    r'$Frac_{free}=%.4f$' % (result.params['frac_1'].value),
    r'$Frac_{fast}=%.2f$' % (result.params['f_fast']),
    r'\chi^2_{red}=%.3f$' % (result.redchi))
ax.text(0.65,0.4,diff_text,transform=ax.transAxes,fontsize=12)

plt.legend(loc='upper right',bbox_to_anchor=(0.95,0.4))

```

[33]: <matplotlib.legend.Legend at 0x16f4fc06ce0>

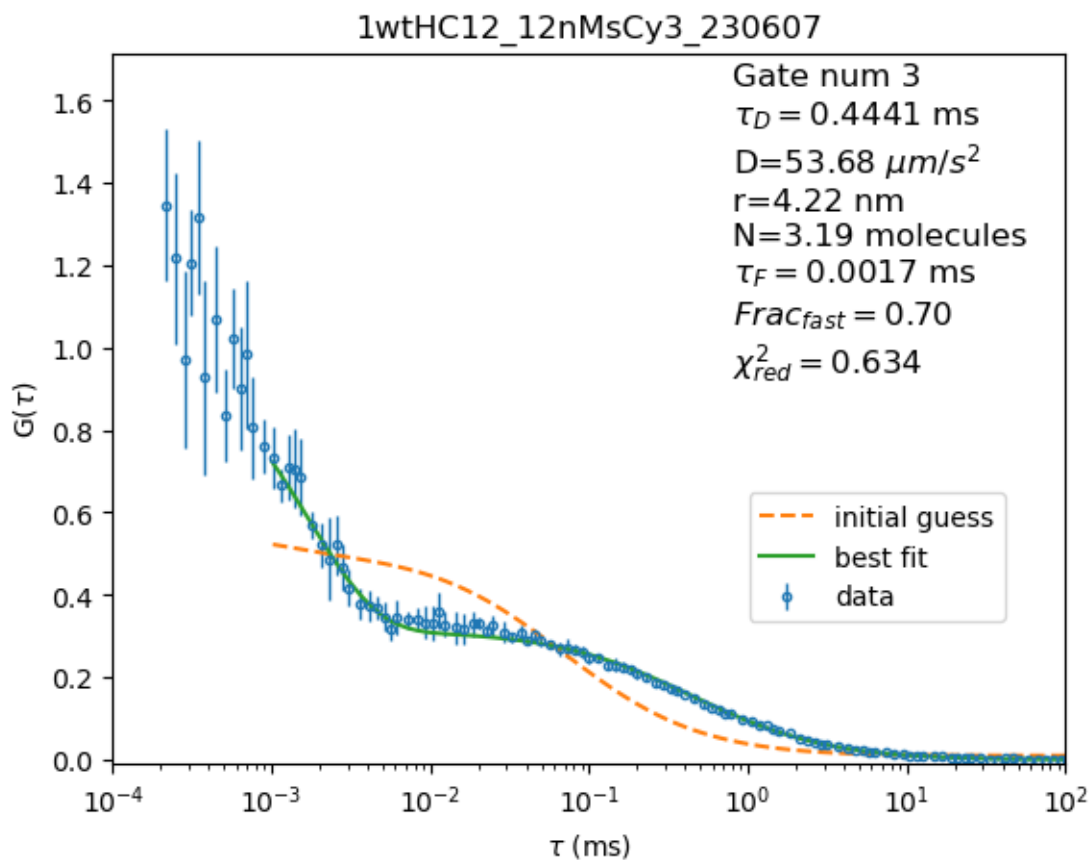



To get a better idea of the posterior probability distributions of the fit parameters we use the emcee Markov chain Monte Carlo sampler (e.g. [fitting a line](#).) In simplified terms, this approach creates a series of walkers which contain a set of parameter values. These walkers are init using the optimised parameters from the least-squares fit. Each walker takes steps across the parameter space forming a Markov chain and tend to spend more time in areas of higher likelihood as they explore the parameter space.

```
[34]: emcee_kws = dict(steps=3000, burn=500, thin=20, is_weighted=True, progress=True)
      result_emcee = trip.fit(y,tau=x, params=result.params.
      ↪copy(),nan_policy='omit',weights=wtg, method='emcee',fit_kws=emcee_kws)
```

```
100%|      | 3000/3000 [01:04<00:00, 46.35it/s]
```

```
[35]: print(result_emcee.fit_report())
```

```
[[Model]]
  ((Model(triplet) * Model(diff_3D)) + Model(baseline))
[[Fit Statistics]]
  # fitting method      = emcee
  # function evals      = 300000
  # data points         = 107
  # variables           = 5
  chi-square            = 64.6743724
  reduced chi-square    = 0.63406247
  Akaike info crit     = -43.8706277
  Bayesian info crit   = -30.5064835
  R-squared             = -15.9013243
[[Variables]]
  f_fast:      0.69641253 +/- 0.02965216 (4.26%) (init = 0.7026406)
  tau_fast:    0.00175830 +/- 2.3454e-04 (13.34%) (init = 0.001714803)
  N:           3.19441448 +/- 0.03795545 (1.19%) (init = 3.192132)
  tau_diff:    0.44481162 +/- 0.01106965 (2.49%) (init = 0.4440728)
  K:           6.447 (fixed)
  G_inf:       3.1915e-04 +/- 1.5538e-04 (48.68%) (init = 0.0003174832)
  N2:          3.19441448 == 'N'
[[Correlations]] (unreported correlations are < 0.100)
  C(f_fast, tau_fast) = -0.8734
  C(N, tau_diff)      = +0.8255
  C(tau_diff, G_inf)  = -0.3424
  C(tau_fast, N)      = +0.2621
  C(tau_fast, tau_diff) = +0.2169
  C(N, G_inf)         = -0.1624
```

To check that the ensemble of walkers have taken enough steps to sample the parameter space and “forget” their initial values, we can plot the parameters for each walker at each time-step. We can see that the parameters are bunched together initially, but quickly diverge after a “burn-in” period. We discard points from this initial burn-in period for subsequent analysis.

```
[36]: samples = result_emcee.sampler.get_chain()
ndim = samples.shape[2]
fig, axes = plt.subplots(ndim, figsize=(10, 7), sharex=True)
labels = result_emcee.var_names
for i in range(ndim):
    ax = axes[i]
    ax.plot(samples[:, :, i], "k", alpha=0.3)
    ax.set_xlim(0, len(samples))
    ax.set_ylabel(labels[i])
    ax.yaxis.set_label_coords(-0.1, 0.5)
ax.set_xlabel('steps')
```

[36]: Text(0.5, 0, 'steps')

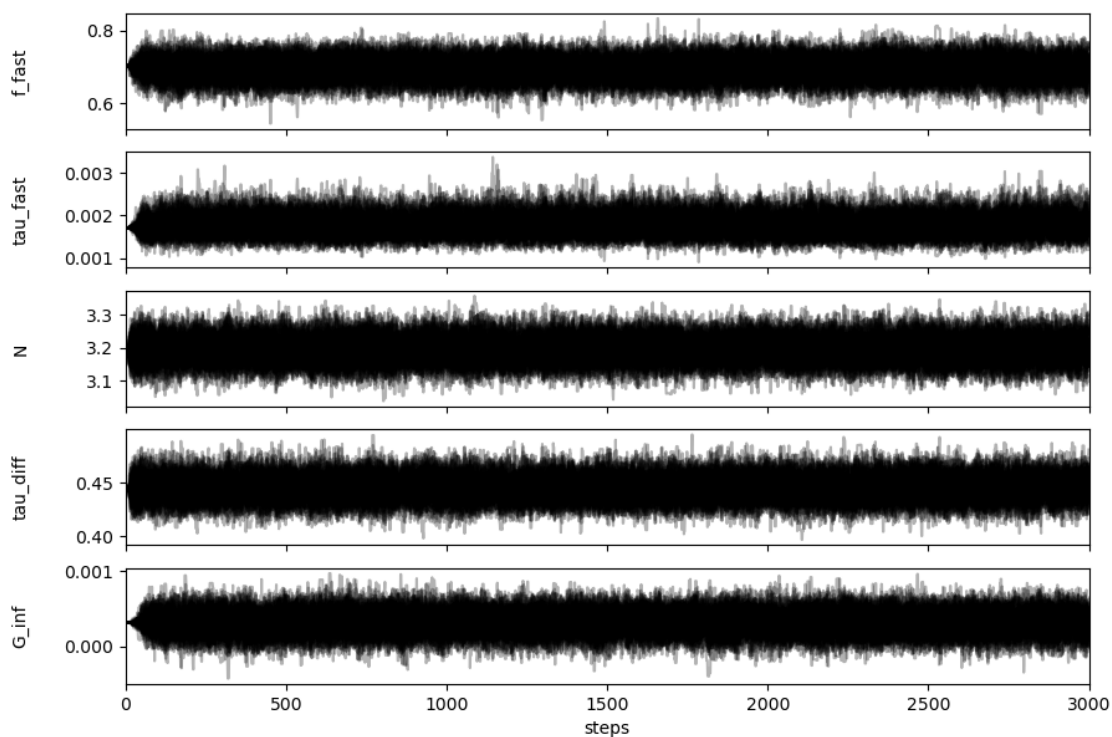

Another diagnostic we can plot is the projection of our results into the space of the observed data. To do this we pick a random set of parameters from the chain (in this case 500) and plot them with a transparency/alpha value of 0.05. In the example below we see that all samples closely agree in the diffusive region of autocorrelation curve ( $\tau > 10^{-2}$ ), while there is a large variation in the exponential region.

```
[37]: plot_emcee(df=df, x_orig=x_orig, y_orig=y_orig, wgt_orig=wgt_orig, x=x,
↳ result_emcee=result_emcee, name=df.pickle_name[file],
```

```
curve=gate, tau_R6G=0.0624, file=file, n_diff=n_diff, trip=trip,
↳scale=False, scale_val=data.scales[gate])
```

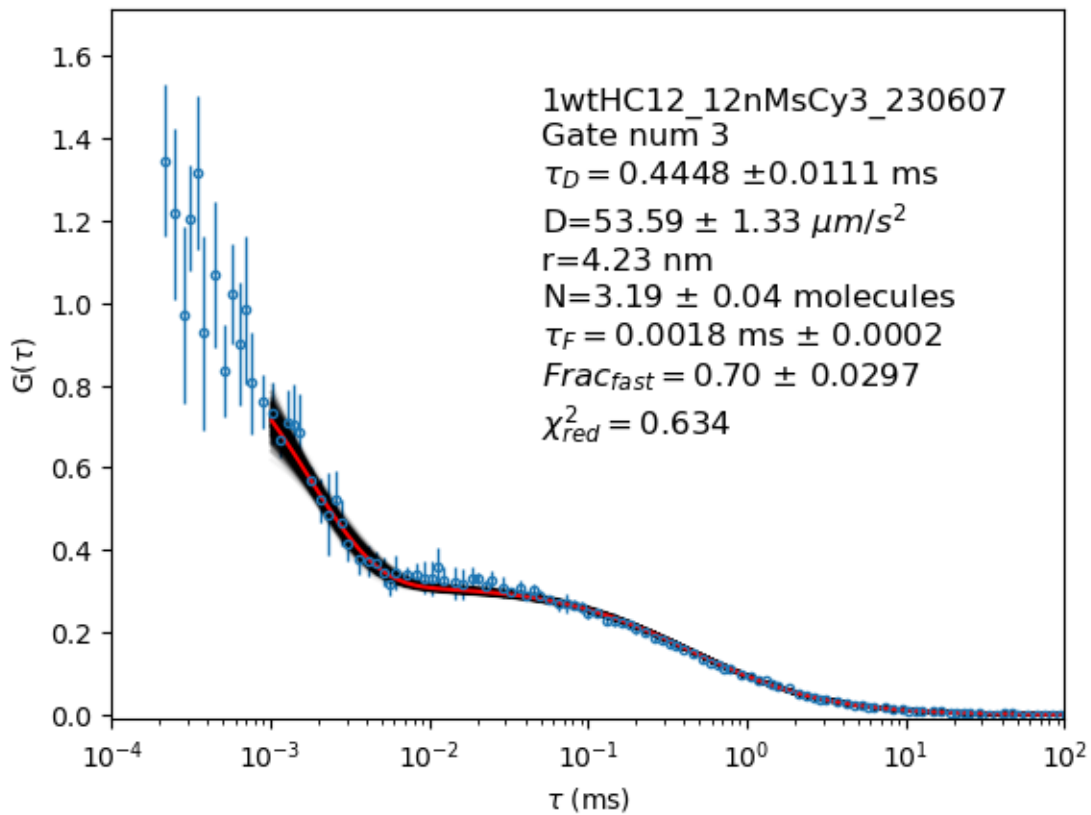

To investigate the relationship between the parameters we can use the corner package to make a plot of the 1D and 2D projections of the posterior probability distribution for each parameter. In this case we see that the probability distribution of each parameter is largely normally distributed. Furthermore there is an inverse correlation between  $\tau_{fast}$  and  $f_{fast}$ , while there is a positive correlation between  $\tau_{diff}$  and  $N$ .

```
[38]: emcee_corner = corner.corner(result_emcee.flatchain, labels=result_emcee.
↳var_names,
                                     truths=[result_emcee.values[free] for free in
↳result_emcee.var_names])
```

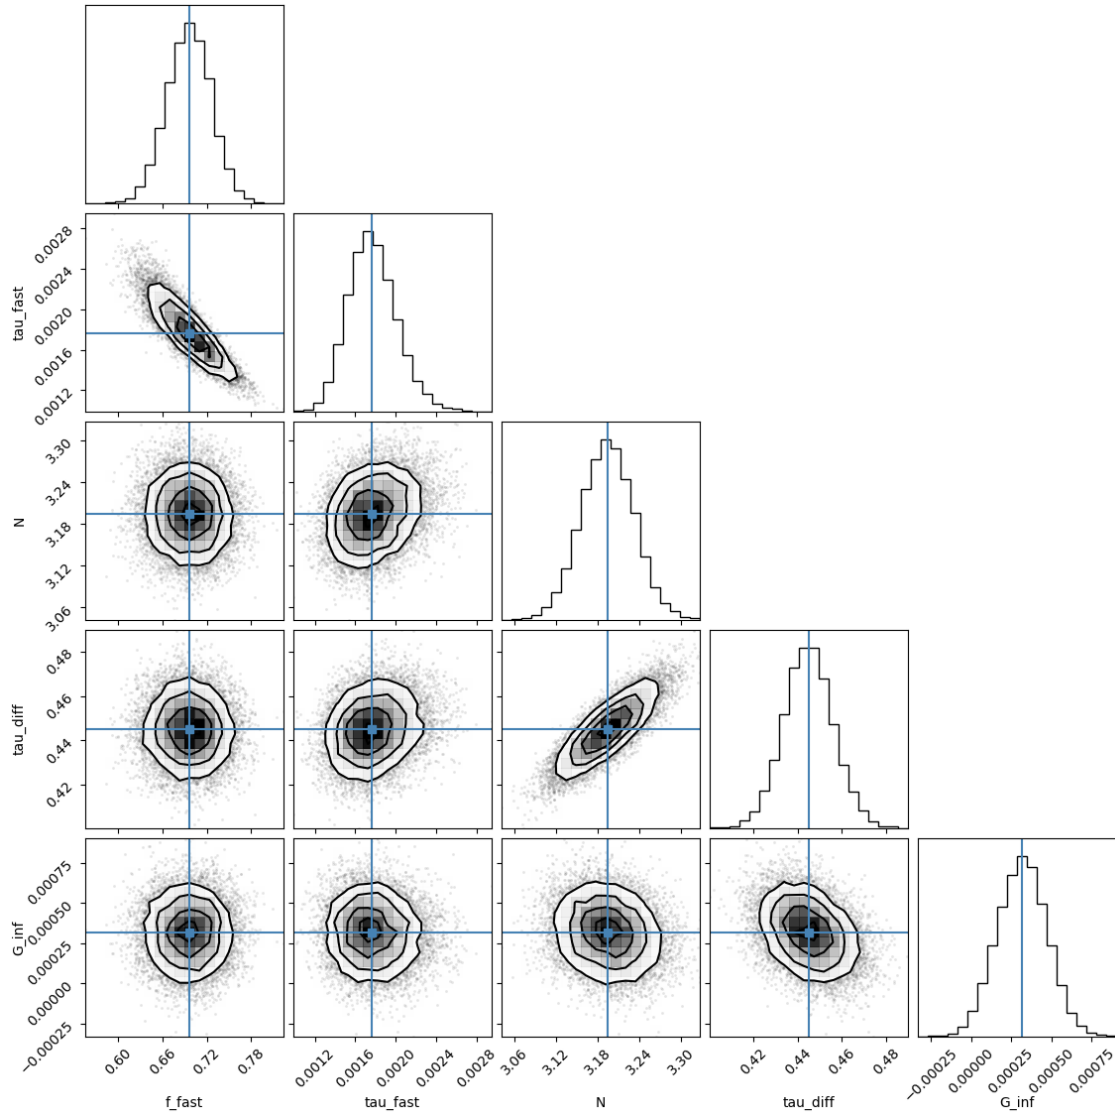

Similar to the sgFCS autocorrelation generation, we can batch fit the data. To do this we create another excel file that contains the location for the data and the results, as well as the datafile suffix, number of diffusing species and any relevant calibration data. The batch processing will produce an excel file with the optimised parameters at each  $t_g$ , their corresponding error and the  $\chi^2_{red}$ . It will also save the plotted MCMC samples annotated with key fit parameters.

NB `tau_diff1` is selected using the reverse shrinking gate method described in the supplementary information. To run this approach use `fitter.revShrinkGateChop(subchan,tTime,dTime,n_slice,comb_filt,split)` or the corresponding `batch_class_revshrinkchop()`

```
[40]: df = pd.read_excel('filenames_Conc_full.xlsx')
batch = pd.read_excel('batch_fit.xlsx')
batch
```

```
[40]: file      dat_folder      res_folder      suff  n_diff  tau_diff1  sub  \
0      0  Processed_data/  Processed_data/  10     1     0.0745  True
1      1  Processed_data/  Processed_data/  10     1     0.0739  True
2      2  Processed_data/  Processed_data/  10     1     0.0707  True
3      3  Processed_data/  Processed_data/  10     1     0.0874  True
4      4  Processed_data/  Processed_data/  10     1     0.0754  True
5      5  Processed_data/  Processed_data/  10     1     0.0939  True
6      6  Processed_data/  Processed_data/  10     1     0.0921  True
7      7  Processed_data/  Processed_data/  10     1     0.1043  True
8      8  Processed_data/  Processed_data/  10     1     0.1658  True
9      0  Processed_data/  Processed_data/  10     2     0.0745  True
10     1  Processed_data/  Processed_data/  10     2     0.0739  True
11     2  Processed_data/  Processed_data/  10     2     0.0707  True
12     3  Processed_data/  Processed_data/  10     2     0.0874  True
13     4  Processed_data/  Processed_data/  10     2     0.0754  True
14     5  Processed_data/  Processed_data/  10     2     0.0939  True
15     6  Processed_data/  Processed_data/  10     2     0.0921  True
16     7  Processed_data/  Processed_data/  10     2     0.1043  True
17     8  Processed_data/  Processed_data/  10     2     0.1658  True
```

```
      K  tau_R6G
0  6.447  0.06240
1  6.447  0.06240
2  6.447  0.06240
3  6.447  0.06240
4  6.447  0.06240
5  6.447  0.06240
6  6.447  0.06240
7  5.800  0.05077
8  5.800  0.05077
9  6.447  0.06240
10 6.447  0.06240
11 6.447  0.06240
12 6.447  0.06240
13 6.447  0.06240
14 6.447  0.06240
15 6.447  0.06240
16 5.800  0.05077
17 5.800  0.05077
```

```
[ ]: for _,row in batch.iterrows():
      ↪ batcher(df,file=row['file'],dat_folder=row['dat_folder'],res_folder=row['res_folder'],
            suff = row['suff'],steps = 2000,n_diff = row['n_diff'],tau_diff1 =
            ↪row['tau_diff1'],
            K=row['K'],sub=row['sub'],tau_R6G=row['tau_R6G'],scale=True)
```
